# Supplementary material for: Microcapsule functionalization enables rate-determining release from cellulose nonwovens for long-term performance
Source: Royal Society of Chemistry journal article supplement (doi:10.1039/d2tb02485c), 2023-01-01
Supplement: d2tb02485c1.pdf [file d2tb02485c1.pdf]

Supporting Information

**Microcapsule functionalization enables rate-determining release from  
cellulose nonwovens for long-term performance**

Viktor Eriksson<sup>a</sup>, Jules Mistral<sup>a,b</sup>, Ting Yang Nilsson<sup>c</sup>, Markus Andersson Trojer<sup>c</sup>, and Lars Evenäs<sup>a, d, \*</sup>

<sup>a</sup> Department of Chemistry and Chemical Engineering, Chalmers University of Technology,  
412 96 Gothenburg, Sweden

<sup>b</sup> Univ Lyon, CNRS, UMR 5223, Ingénierie des Matériaux Polymères, Université Claude  
Bernard Lyon 1, INSA Lyon, Université Jean Monnet, F-69622 Villeurbanne Cédex,  
France

<sup>c</sup> Department of Polymers, Fibers and Composites, Fiber Development, RISE, 431 53 Mölndal,  
Sweden

<sup>d</sup> Wallenberg Wood Science Center, Chalmers University of Technology, 412 96 Gothenburg,  
Sweden

---

\* Corresponding author. E-mail address: lars.evenas@chalmers.se

## 1. Size distribution

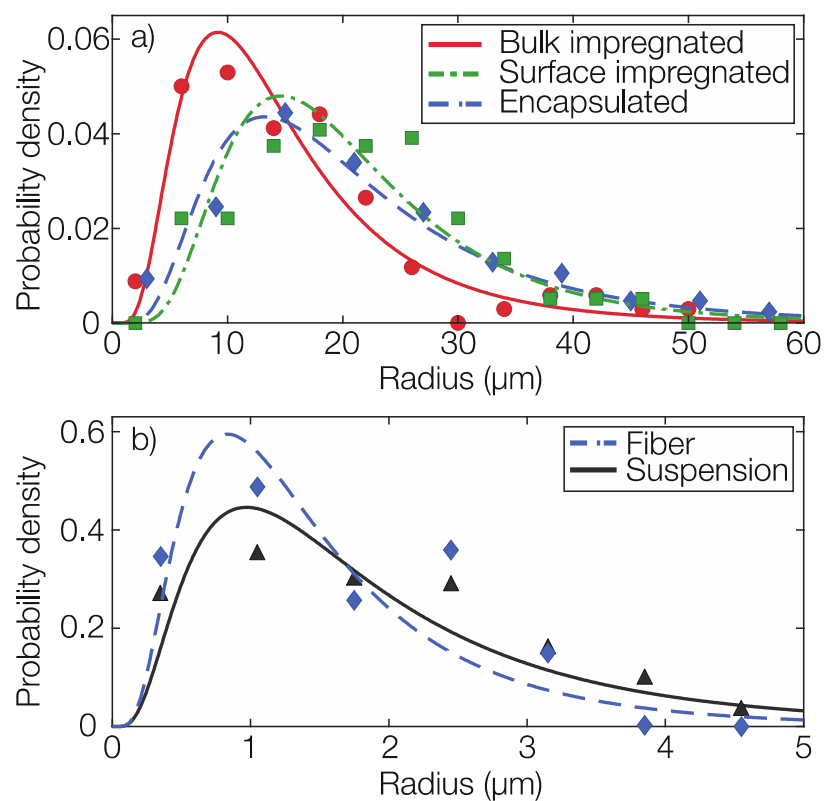

**Figure S1.** Size distributions of a) the fibers and b) microspheres embedded in fibers and aqueous suspension, respectively.

## 2. UV-vis spectrophotometry

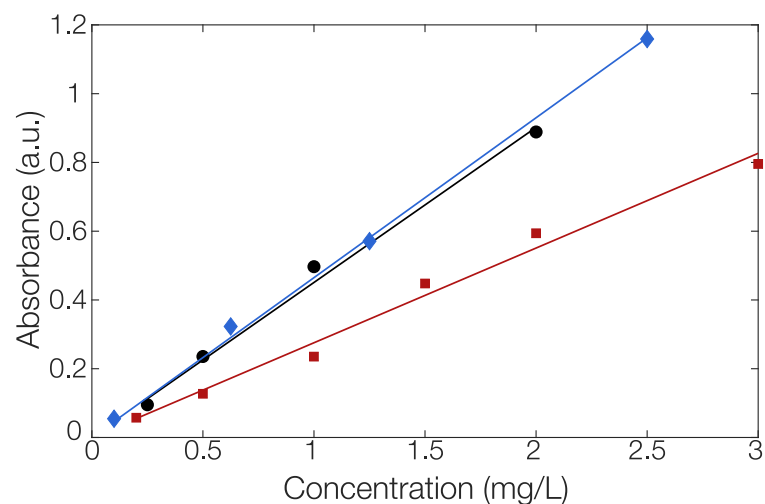

**Figure S2.** UV-vis calibration curves for pyrene in methanol ( $\bullet$ ,  $\epsilon = 0.45 \text{ L mg}^{-1}\text{cm}^{-1}$ ), 3:1 ethanol:6 wt.% (aq.) Brij L23 ( $\blacklozenge$ ,  $\epsilon = 0.47 \text{ L mg}^{-1}\text{cm}^{-1}$ ) and 6 wt.% (aq.) Brij L23 ( $\blacksquare$ ,  $\epsilon = 0.28 \text{ L mg}^{-1}\text{cm}^{-1}$ ).

### 3. Modelling of pyrene diffusion

The modelling of the diffusional release of pyrene was modelled with the diffusion equations described by Crank.<sup>1</sup> From fibers with bulk impregnated pyrene, the release can be modelled by diffusion from a cylinder with a homogeneous distribution of pyrene. This can be applied to fibers containing microspheres as well, however, this results in an apparent diffusivity across the entire fiber cross-section rather than an effective diffusion coefficient. Similar to a sphere, release from a cylinder can be described by

$$f_c(a,t) = \frac{\alpha_c}{1 + \alpha_c} \left( 1 - \sum_{n=1}^{\infty} \frac{4\alpha_c(1 + \alpha_c)}{4 + 4\alpha_c + \alpha_c^2 q_{c,n}^2} \exp\left(-\frac{Dq_{c,n}^2 t}{a^2}\right) \right) \quad (\text{S1})$$

where  $a$  is the fiber radius, and  $\alpha_c$  is defined as

$$\alpha_c = \frac{V_{\text{sink}}}{V_{\text{cyl}} K} \quad (\text{S2})$$

The coefficient  $q_{c,n}$  is defined as the  $n$ :th non-zero positive root of

$$\alpha_c q_{c,n} J_0(q_{c,n}) + 2J_1(q_{c,n}) = 0 \quad (\text{S3})$$

where  $J_0$  and  $J_1$  are the Bessel functions of the first kind of order 0 and 1 respectively. Since the fibers also are polydisperse, the final fractional release is given by

$$\frac{m_t}{m_{\text{tot}}} = \frac{\int f_c(a,t) p(a) a^2 da}{\int p(a) a^2 da} \quad (\text{S4})$$

The final geometry is that when pyrene was impregnated on the fiber surface. In this case, two contributions were seen in the release. Partly there was a rapid burst release, and partly a release from a distance  $L$  of the average fiber cross-section into which the pyrene had dissolved during the impregnation. The kinetics of the burst was assumed to follow zero-order kinetics. These two contributions can be expressed as

$$\frac{m_t}{m_{\text{tot}}} = \begin{cases} p_b k_b t + (1 - p_b) f_w(L,t) & t < t_b \\ p_b k_b t_b + (1 - p_b) f_w(L,t) & t > t_b \end{cases} \quad (\text{S5})$$

where  $p_b$  is the burst fraction,  $k_b$  is the rate constant for the burst release and  $t_b$  is the time during which the burst release occurs. The diffusional contribution  $f_p(L,t)$  was taken as diffusion from a plane sheet,

$$f_p(L,t) = 1 - \sum_{n=0}^{\infty} \frac{8}{(2n+1)^2 \pi^2} \exp\left(-\frac{D(2n+1)^2 \pi^2 t}{4L^2}\right) \quad (\text{S6})$$

Individual fits of the diffusion models to each data set are presented in Figure S3.

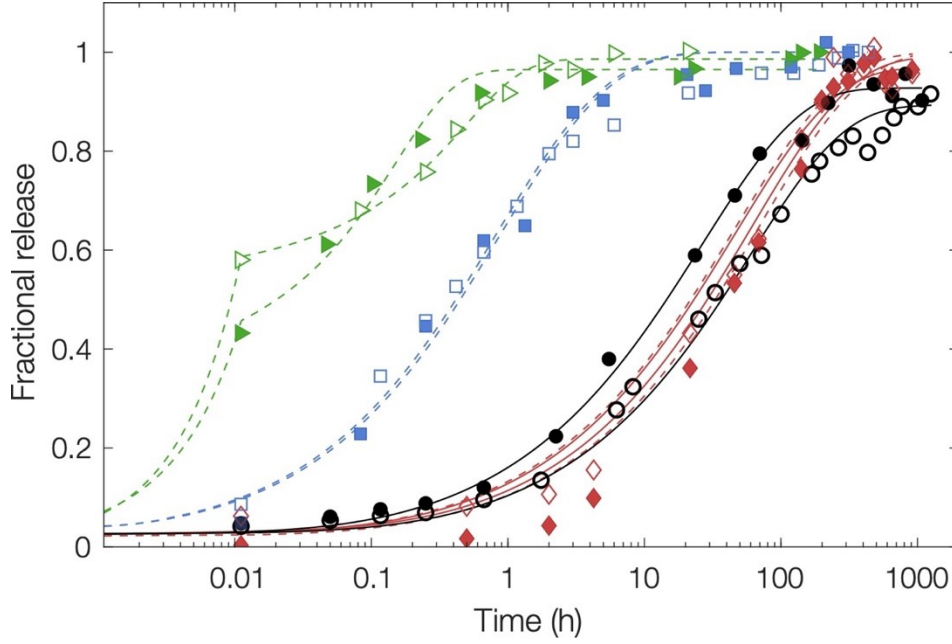

**Figure S3.** Fractional release from fibers with pyrene loaded by surface impregnation ( $\blacktriangleright\blacktriangleleft$ ), bulk impregnation ( $\blacksquare$ ), and microencapsulation ( $\blacklozenge$ ). Release from microspheres in aqueous suspension ( $\circ\bullet$ ) is shown as a comparison. Lines represent individual fits of the diffusion equations to each replicate. Solid lines are based on a spherical geometry, and dashed lines are based on a cylindrical geometry.

The specific effect of the microcapsule in terms of barrier properties can be determined by using simplified models<sup>2</sup>. It is important to note here that the models are not intended to predict precise quantities, only the magnitudes of the parameters. These simplifications include steady-state, the reduction to planar geometry (which however is appropriate for sufficiently thin sections at the surface of the microsphere), perfect sink conditions, and a linearization of the concentration gradient in the barrier compartments. The parameters included in the model are defined within a finite fiber segment as visualized in Figure S4.

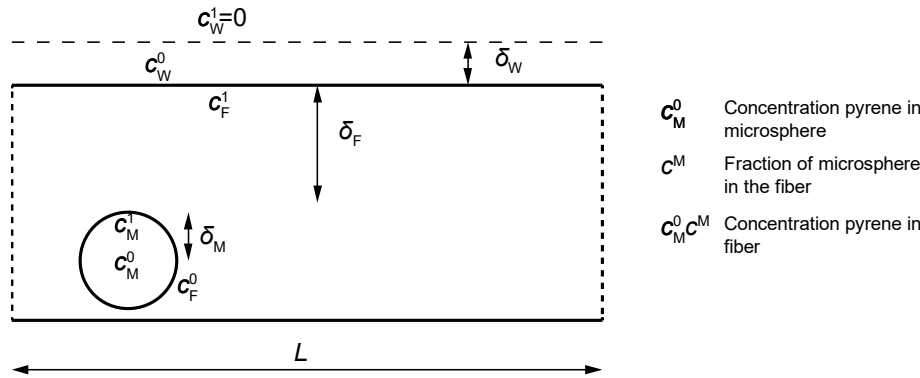

**Figure S4.** Schematic representation of a fiber segment (index F) containing microspheres (index M) with the parameters used in subsequent models included.

The release rate ( $\dot{m}$ ) can then be expressed as

$$\dot{m} = \frac{A_i D_i (c_i^0 - c_i^1)}{\delta_i} \quad (S7)$$

$$A_M^{\text{TOT}} = \frac{c^M V_F}{V_M} A_M = \frac{c^M \delta_F^2}{\delta_M} \quad (\text{S8})$$

$$A_F = \delta_F L \quad (\text{S9})$$

$$K_{ij} = \frac{c_i^1}{c_j^0} = \frac{1}{K_{j/i}} \quad (\text{S10})$$

where the indices M denotes the microsphere, F denotes the fiber, and W denotes the aqueous continuous phase.  $A_i$  is the surface area for each phase with corresponding diffusion coefficient ( $D_i$ ) and volume ( $V_i$ ). Finally,  $K_{ij}$  is the partition coefficient for pyrene between the two phases. At steady state, this leads to

$$\dot{m} = c^M c_M^0 \frac{\delta_F^2 L}{\delta_M} \frac{1}{\left( \frac{\delta_M}{D_M} + \frac{\delta_F}{K_{F/M} D_F} + \frac{\delta_W}{K_{W/M} D_W} \right)} \approx 0 \quad (\text{S11})$$

The contribution from the diffusive layer in the aqueous phase can be neglected since we can assume that  $\delta_W$  is very small and  $D_W$  very high.

By defining

$$\dot{m} = \frac{c^M c_M^0 A_F}{\delta_F} D_{\text{app}} \quad (\text{S12})$$

and combining Equation (S11) and (S12), the apparent diffusion coefficient  $D_{\text{app}}$  can be expressed as

$$D_{\text{app}} = \frac{\delta_F}{\delta_M} \frac{\delta_F}{\left( \frac{\delta_M}{D_M} + \frac{\delta_F}{K_{F/M} D_F} \right)} \quad (\text{S13})$$

Here, the denominator can be identified as the resistance  $R_i$  towards diffusion. The ratio  $\delta_F/\delta_M$  is a consequence of the higher total surface area for the microspheres, which for a given  $c^M$  increases the release rate as the microsphere radii  $\delta_M$  decreases.  $D_M$  and  $D_F$  are the diffusivities of pyrene within each layer, taken from the fitted values in Figure 5 in the article. The partition coefficient  $K_{F/M}$  was taken as  $K_{F/M} = 0.1$  based on the difference in fluorescence intensity between microcapsule and fiber matrix, respectively, in the confocal micrograph in Figure 2b. A magnification of the confocal micrograph along with an intensity profile across the particle is shown in Figure S5. It should be noted here that part of the fluorescence intensity from the cellulose is due to its autofluorescence, and not necessarily only pyrene. Consequently, the true partition coefficient may be smaller than estimated from micrographs.

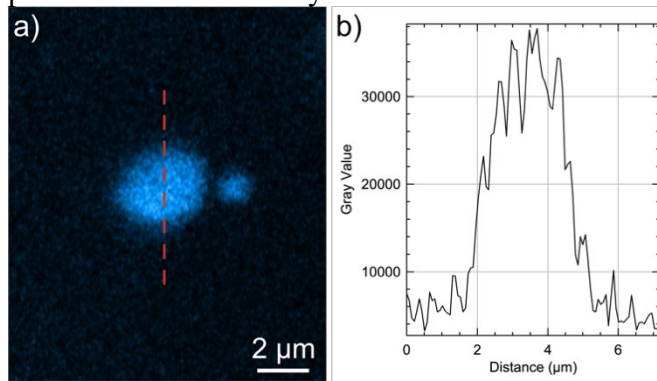

**Figure S5.** a) Confocal micrograph of a microcapsule embedded in a cellulose fiber. b) Intensity profile along the red dashed line shown in a).

Using the parameters described above, an apparent diffusivity for the composite material of  $D_{app} = 3 \cdot 10^{-16} \text{ m}^2\text{s}^{-1}$  was found. This was in excellent agreement with the fitted apparent diffusion coefficient from the solution to the diffusion equation on a cylindrical geometry in Equation S1-S4, see Figure 5 in the article. Moreover, by setting  $R_M=R_F$ , it could be determined that the microspheres start to dominate the release already at a critical size  $\delta_M^c$  of 30 nm. Note that Equation (S13) is not valid for very small  $\delta_M$  where the area differs considerably between the microspheres and the fiber. Instead, for visualizing the effect of  $R_i$  on  $D_{app}$ , the areas between all phases can be taken as constant and equal. In this case, Equation (S13) is reduced to

$$D_{app} = \frac{\delta_M + \delta_F}{\frac{\delta_M}{D_M} + \frac{\delta_F}{K_{F/M}D_F}}, \quad (\text{S14})$$

which is shown graphically in Figure S6.

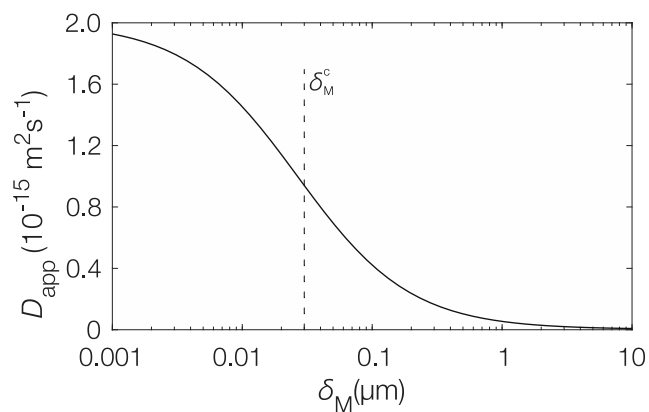

**Figure S6.** Apparent pyrene diffusivity  $D_{app}$  in a composite cellulose fiber containing microspheres of size  $\delta_M$ , with the critical microsphere size ( $\delta_M^c$ ) marked by a dashed line.

#### 4. Release measurements

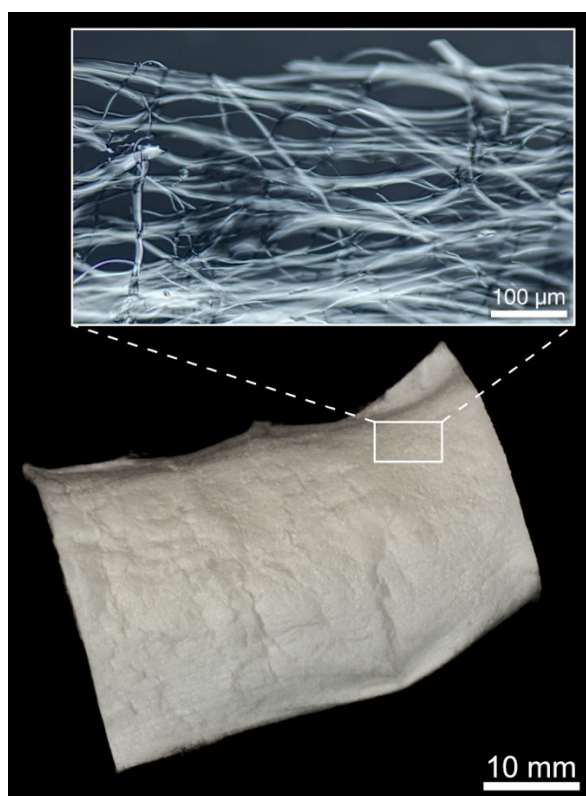

**Figure S7.** Photograph of a small section of the prepared nonwoven materials. The inset shows a micrograph with a magnification of the fiber structure.

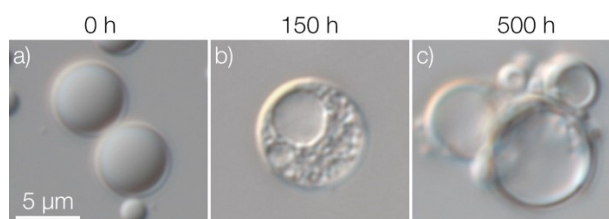

**Figure S8.** Micrographs of PLGA microcapsules imaged a) immediately after formulation as well as after b) 150 h and c) 500 h in aqueous release medium. The scale bar is valid for all subfigures

In Figure S8, the time-resolved morphological changes of the microcapsules upon hydrolytic degradation are shown. As can be seen, the degradation results in the formation of multiple cavities which after longer times results in a very thin membrane surrounding a large aqueous core. The fact that the cores are aqueous-based can be determined by their transparency (see Figure S8c) and a similar appearance as the background (the same refractive index). Eventually, the entire suspension is rendered completely transparent. None of these changes are clearly visible by inspection of the fiber material containing microcapsules. Confocal microscopy can however reveal that fiber material is in principle void of any active and only the autofluorescence of the cellulose remains (see Figure S9). Note that the microcapsules are hardly discernable in Figure S9. It is worth noting here that the degradation in the fiber material is slower than the corresponding degradation in the aqueous suspension, likely due to the significantly lower exposure to water inside the cellulose matrix.

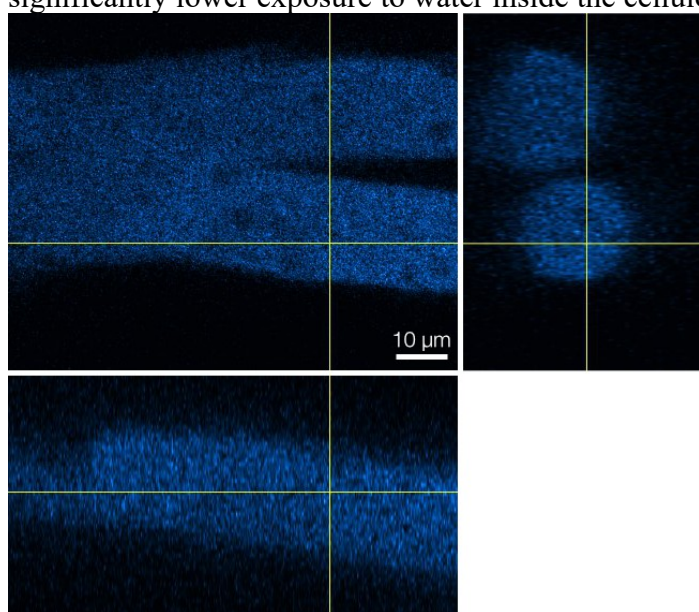

**Figure S9.** Orthogonal projections of confocal micrographs taken on the microcapsule-loaded material after 2500 hours in the release medium.



## 5. Cytotoxicity

**Table S1.** Measured and average absorption of the six replicates of the nonwoven, positive and negative control.

|                                 | Absorption (570-650 nm) |       |       | Average | Standard deviation |
|---------------------------------|-------------------------|-------|-------|---------|--------------------|
| Microsphere-containing nonwoven | 0.691                   | 0.680 | 0.692 | 0.689   | 0.007              |
|                                 | 0.700                   | 0.687 | 0.686 |         |                    |
| Positive control                | 0.007                   | 0.008 | 0.009 | 0.007   | 0.002              |
|                                 | 0.006                   | 0.005 | 0.008 |         |                    |
| Negative control                | 0.651                   | 0.660 | 0.667 | 0.678   | 0.022              |
|                                 | 0.689                   | 0.700 | 0.702 |         |                    |

**Table S2.** Obtained viabilities and cytotoxicity grading as calculated according to ISO10993-5:2009 from the data in Table S1.

|                                 | Viability [%] |       |       | Average | Standard deviation | Cytotoxicity grading |
|---------------------------------|---------------|-------|-------|---------|--------------------|----------------------|
| Microsphere-containing nonwoven | 100.7         | 99.1  | 100.8 | 100.5   | 1.0                | Not cytotoxic        |
|                                 | 102.0         | 100.2 | 100.0 |         |                    |                      |
| Positive control                | 1.0           | 1.1   | 1.4   | 1.0     | 0.2                | Cytotoxic            |
|                                 | 0.9           | 0.7   | 1.2   |         |                    |                      |
| Negative control                | 94.8          | 96.2  | 97.2  | 98.8    | 3.2                | Not cytotoxic        |
|                                 | 100.4         | 102.0 | 102.3 |         |                    |                      |

## 6. References

1. Crank, J., *The mathematics of diffusion*. Oxford university press: 1979.
2. Trojer, M. A.; Andersson, H.; Li, Y.; Borg, J.; Holmberg, K.; Nydén, M.; Nordstierna, L., Charged microcapsules for controlled release of hydrophobic actives. Part III: the effect of polyelectrolyte brush- and multilayers on sustained release. *Physical Chemistry Chemical Physics* **2013**, *15* (17), 6456-6466.
